# Supplementary material
Source: Springer Nature journal article supplement (https://www.springermedizin.de/resource/supplementary/12943_2009_648_MOESM5_ESM.pdf/9554480)

**A****GL261 Brain tumors**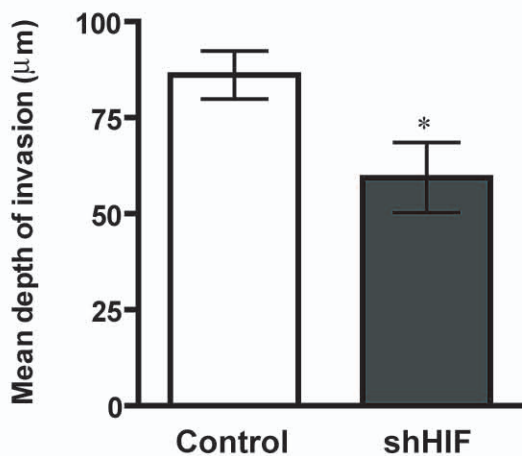**B****Control****shHIF****GFP**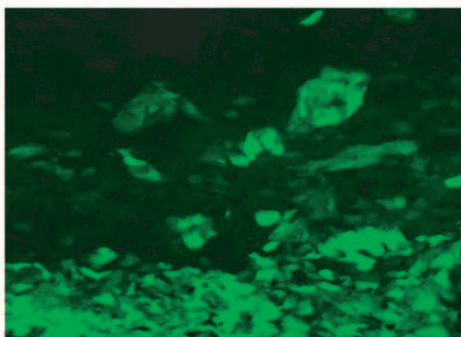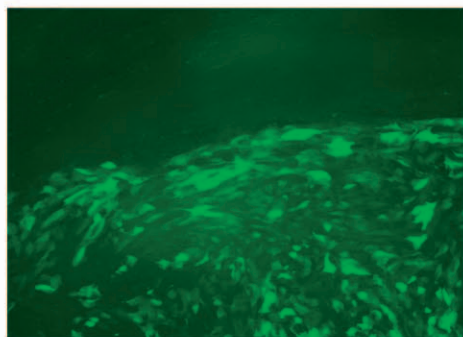**H&E**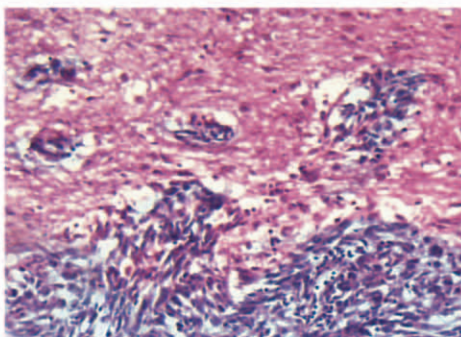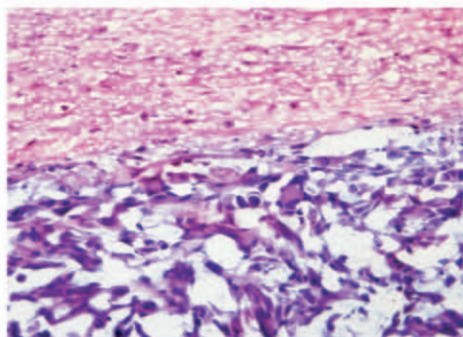**HIF-1α**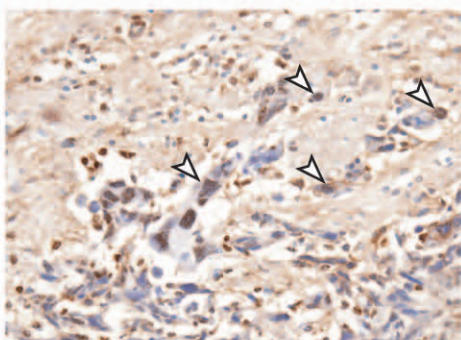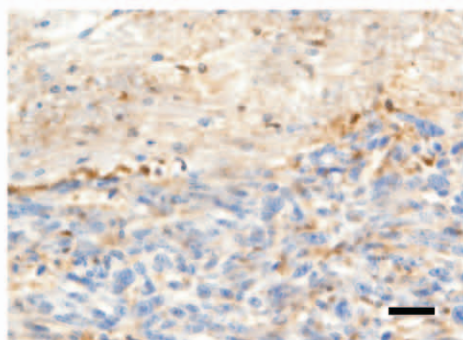

Supplement: MOESM5 [file 9554480]
